# Supplementary material for: High color rendering indices of white light-emitting diodes based on environmentally friendly carbon and AIZS nanoparticles
Source: Royal Society of Chemistry journal article supplement (doi:10.1039/d0tc01192d), 2020-01-01
Supplement: d0tc01192d1.pdf [file d0tc01192d1.pdf]

# High color rendering index white light-emitting diode based on environmental friendly carbon and AIZS nanoparticles

Yanyi Huang,<sup>a</sup> Hao Lin,<sup>a</sup> Jing Qiu,<sup>\*a</sup> Zhongtao Luo<sup>b</sup>,  
Zhiqiang Yao<sup>b</sup>, Libo Liu,<sup>a</sup> Huanbin Liu,<sup>a</sup> Xiaosheng  
Tang<sup>\*a</sup> and Xiaoxiao Fu<sup>c</sup>

<sup>a</sup> *Key Laboratory of Optoelectronic Technology & System of Ministry of Education, College of Optoelectronic Engineering, Chongqing University, Chongqing 400044, China.*

<sup>b</sup> *State Centre for International Cooperation on Designer Low-Carbon and Environmental Materials, School of Materials Science and Engineering, Zhengzhou University, Zhengzhou 450001, China.*

<sup>c</sup> *College of Materials Science and Engineering, Chongqing University, Chongqing, 400044, China.*

\*Email - [jingqiu@cqu.edu.cn](mailto:jingqiu@cqu.edu.cn) and [xstang@cqu.edu.cn](mailto:xstang@cqu.edu.cn)

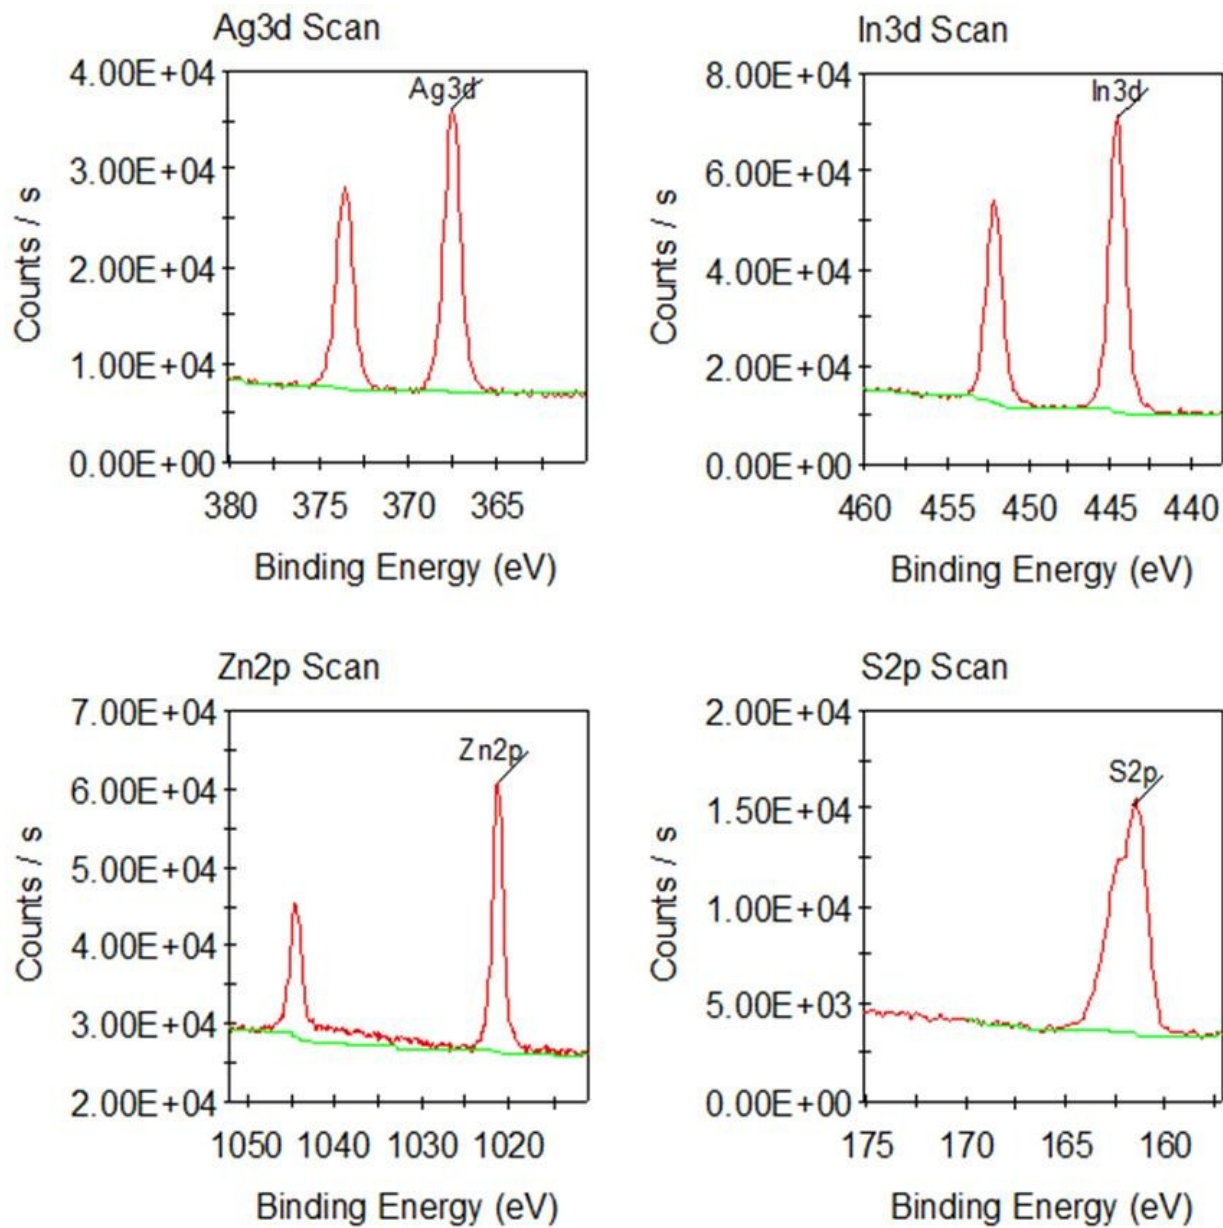

Figure S1. High-resolution XPS pattern of AIZS.

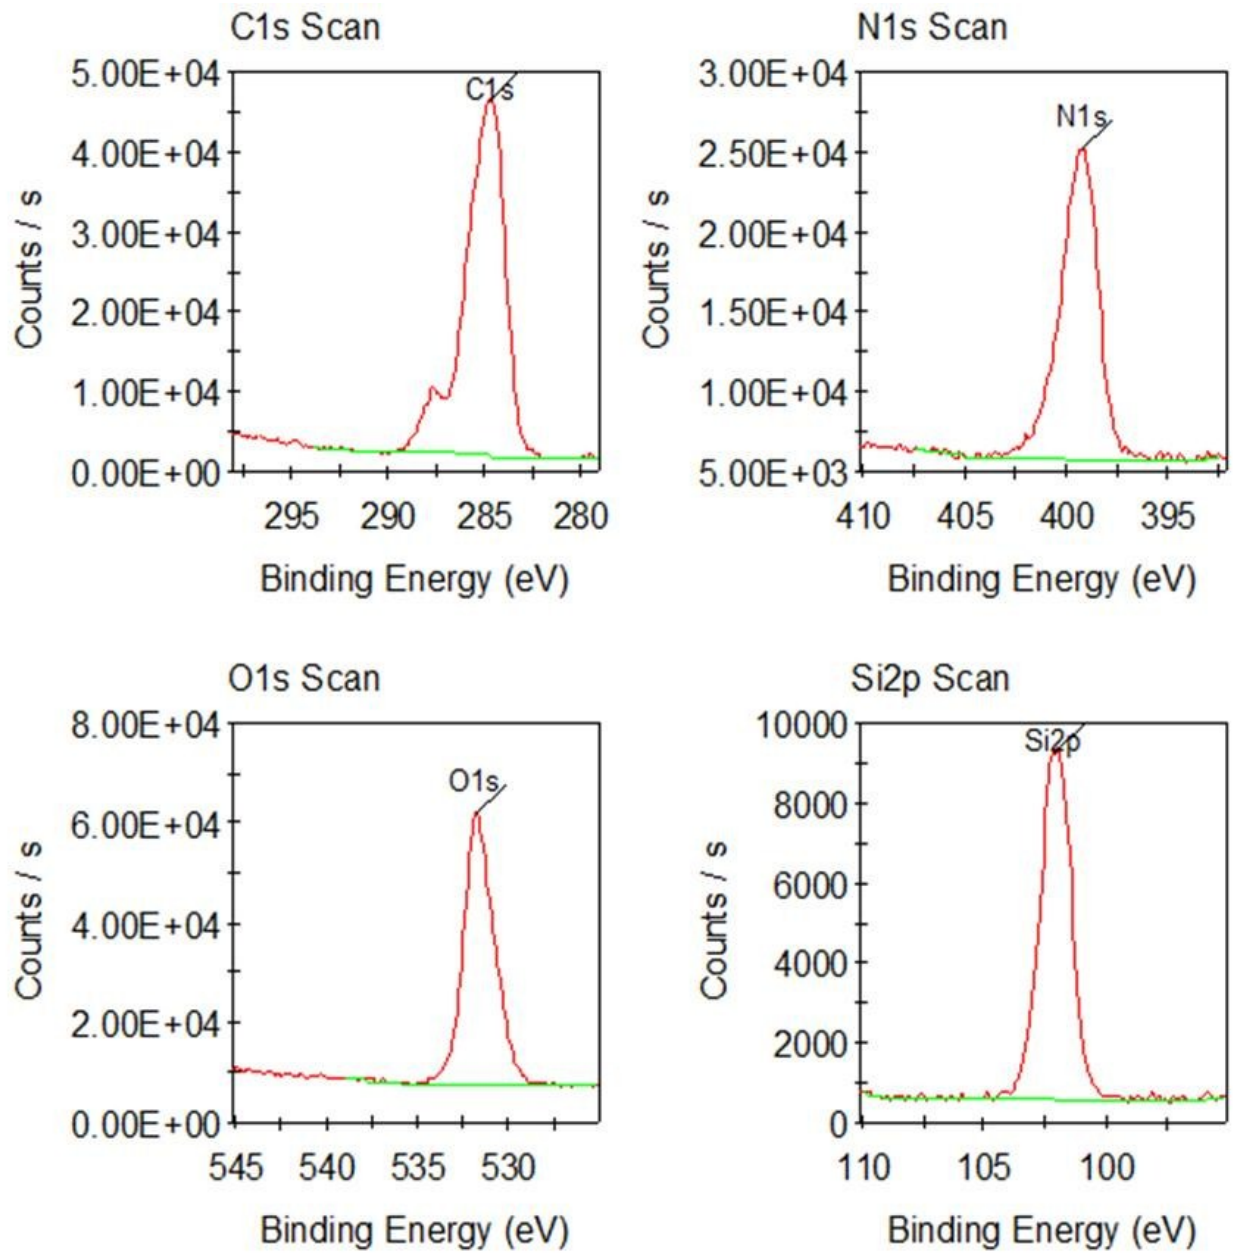

**Figure S2.** High-resolution XPS pattern of B-CDs.

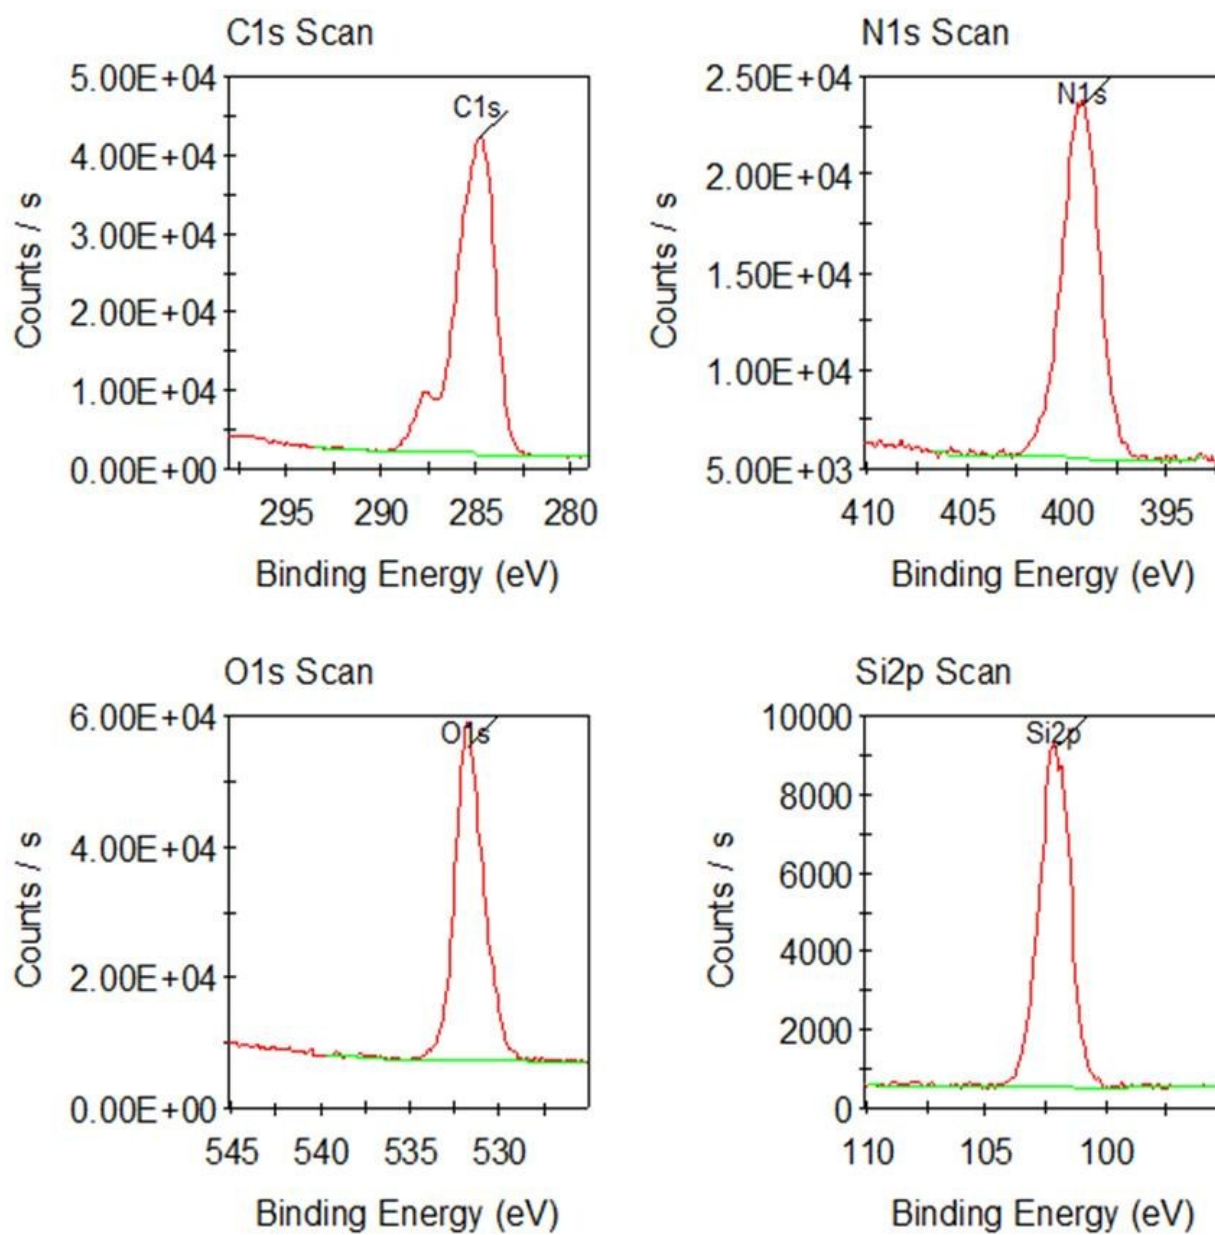

Figure S3. High-resolution XPS pattern of G-CDs

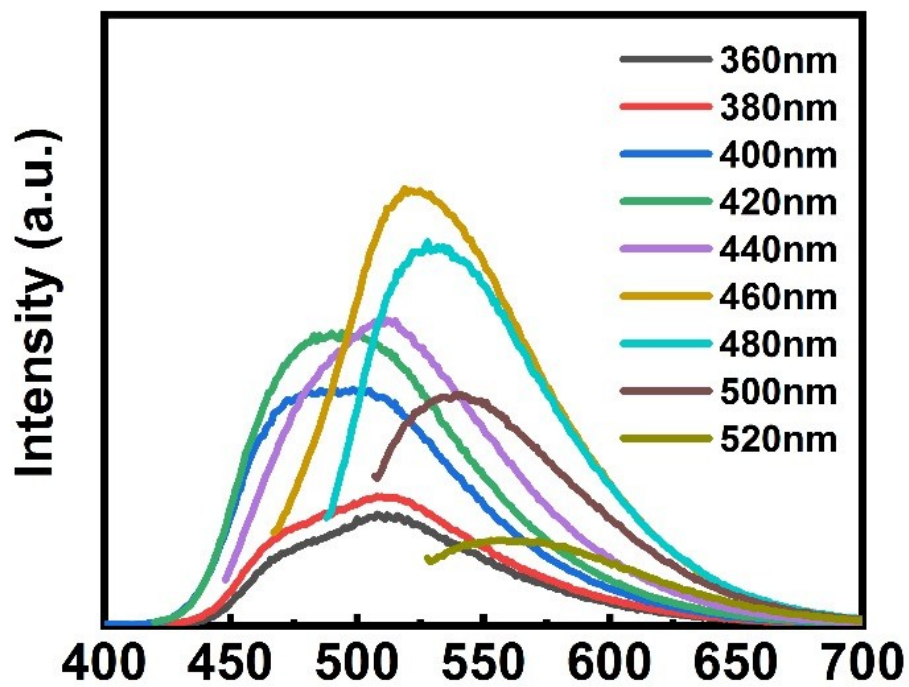

**Figure S4.** PL emission spectra of the G-CDs under different excitation wavelengths.

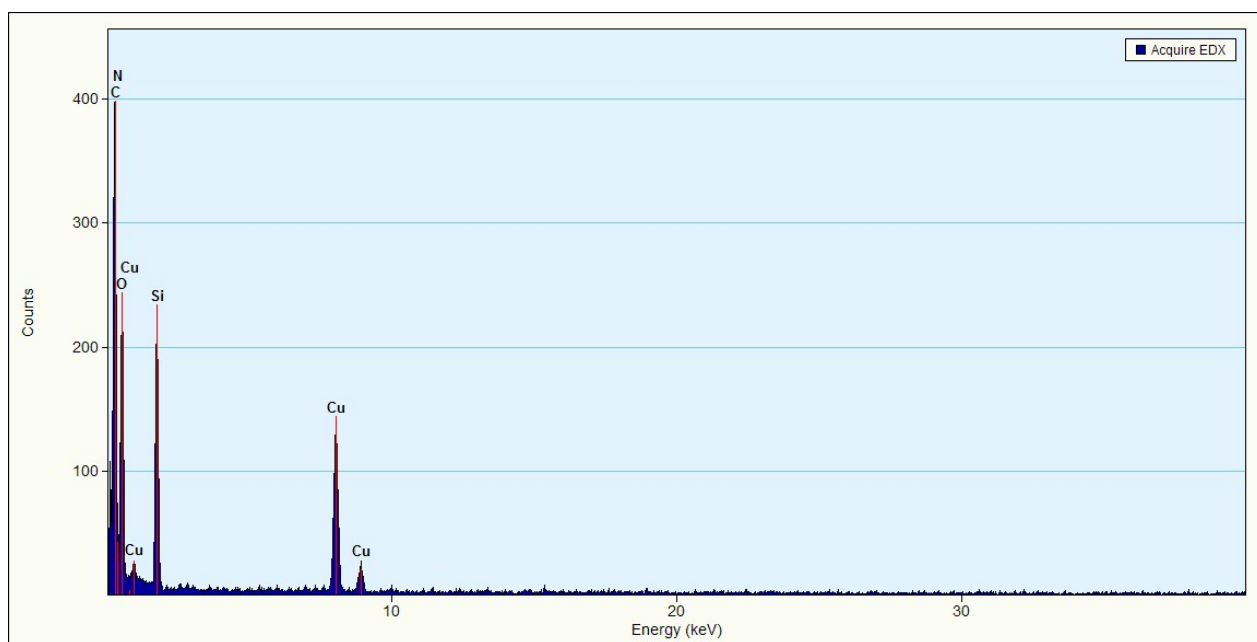

**Figure S5.** Energy dispersive X-ray (EDX) of CDs@SiO<sub>2</sub>.

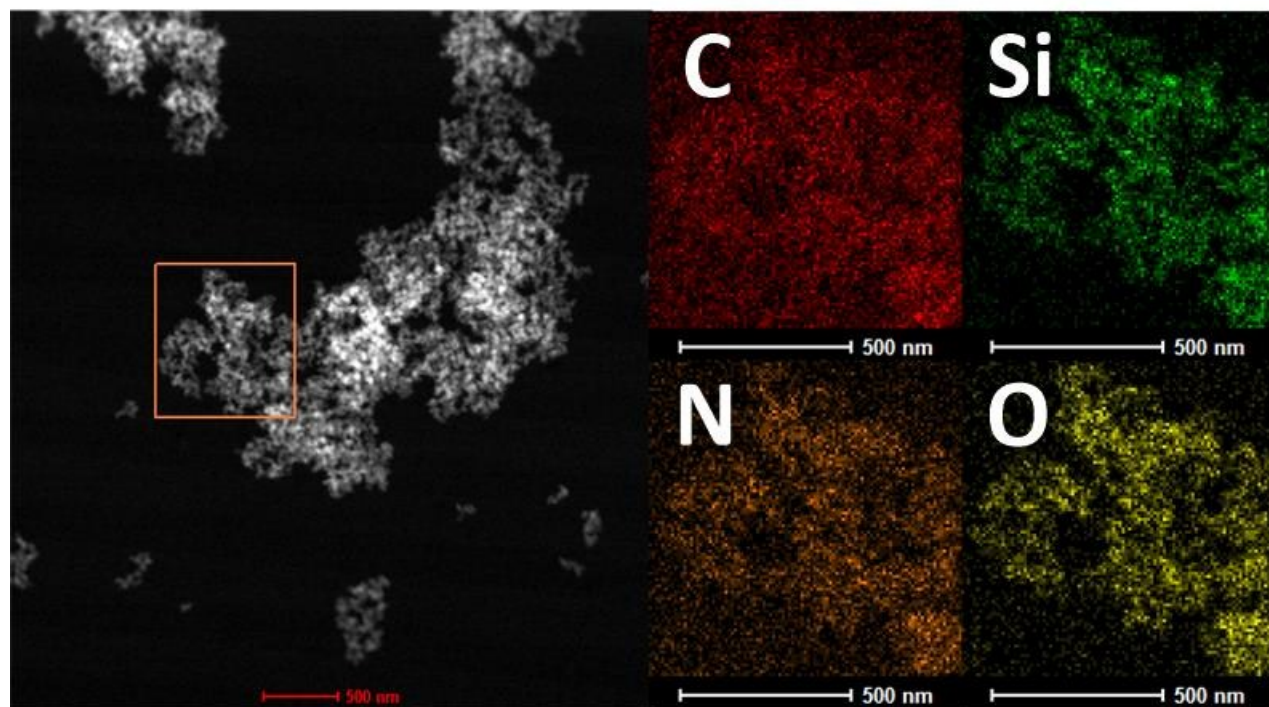

**Figure S6.**elemental mappings of CDs
